# Supplementary material for: Multiple DNA-binding sites in Tetrahymena telomerase
Source: PubMed Central journal article supplement — Nucleic Acids Res. 2008 Jan 3;36(4):1260–72. doi: 10.1093/nar/gkm866 (PMC2275084; doi:10.1093/nar/gkm866), 2008-01-03
Supplement: nar_gkm866_1.pdf [file nar_gkm866_1.pdf]

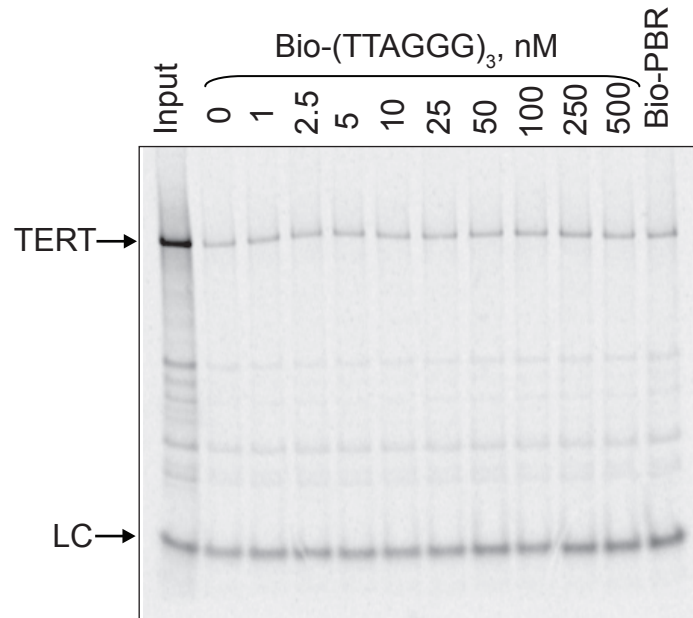

**Supplementary Figure:** DNA binding assay to measure binding of *Tetrahymena* telomerase to human telomeric DNA. The indicated concentrations of biotinylated human telomeric oligonucleotide (Bio-TTAGGG<sub>3</sub>) or 250 nM nontelomeric control (Bio-PBR) were incubated with <sup>35</sup>S-labelled full-length recombinant *Tetrahymena* telomerase (TERT + RNA) and recovered on NeutrAvidin beads. ‘Input’ represents 40% of the starting material in the bound lanes. LC: <sup>33</sup>P-labelled PBR48-Bio oligonucleotide, used as a loading and recovery control.
